# Supplementary material
Source: PubMed Central journal article supplement (PMC6279627)
Supplement: NIHMS985443-supplement-1.pdf [file NIHMS985443-supplement-1.pdf]

## Electronic Supplementary Material

### Tumor Formation of Adult Stem Cell Transplants in Rodent Arthritic Joints

Journal: Molecular Imaging and Biology

Fanny Chapelin, MS<sup>1\*</sup>, Aman Khurana, MD<sup>\*</sup>, Mohammad Moneeb, MS<sup>1</sup>, Florette K. Gray Hazard, MD<sup>2</sup>, Chun Fai (Ray) Chan, PhD<sup>3</sup>, Hossein Nejadnik, MD, PhD<sup>1</sup>, Dita Gratzinger, MD, PhD<sup>2</sup>, Solomon Messing<sup>4</sup>, PhD, Jason Erdmann, BS<sup>5</sup>, Amitabh Gaur, PhD<sup>3</sup>, Heike E Daldrup-Link, MD, PhD<sup>1#</sup>

<sup>1</sup> Department of Radiology, Molecular Imaging Program at Stanford (MIPS), Stanford University, Stanford, CA, USA

<sup>2</sup> Department of Pathology, Stanford University, Stanford, CA, USA

<sup>3</sup> BD biosciences, Custom Technology Team, La Jolla, CA, USA

<sup>4</sup> Department of Communication and Statistics, Stanford, CA, USA

<sup>5</sup> Department of Cytogenetics, Stanford University, Stanford, CA, USA

\* Authors contributed equally.

#Corresponding author:

Heike E Daldrup-Link M.D. PhD, Associate Professor, Department of Radiology, Molecular Imaging Program at Stanford (MIPS), Stanford School of Medicine

725 Welch Rd, Rm 1665, Stanford, CA 94305-5654

Ph: (650) 723-8996, Fax : (650) 725-8957, Email: [H.E.Daldrup-Link@stanford.edu](mailto:H.E.Daldrup-Link@stanford.edu)

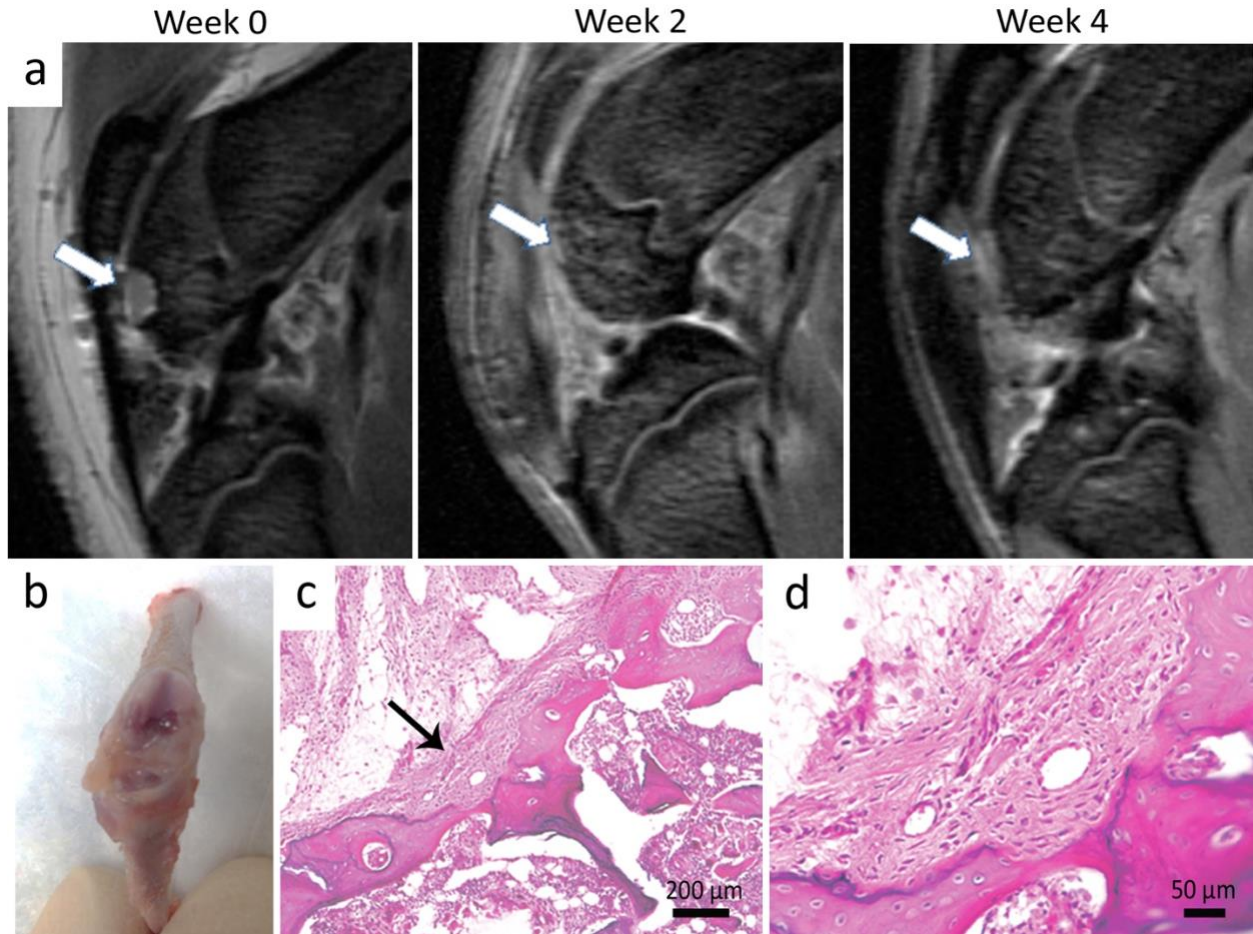

**Figure S1.** Findings in immunocompetent animals. **a** Sagittal T2-weighted FSE images (TR/TE = 3000ms/30ms) of ADSC transplants in cartilage defects of the distal femurs which did not exhibit significant size change over 4 weeks. **b.** ADSC implants do not extend beyond the transplant site in immunocompetent recipients. H&E stains (**c:** 40X; and **d:** 400X) exhibit a well-defined cell implant differentiating into hyaline cartilage and surrounded by unremarkable native bone.
